# Supplementary material
Source: Research Square preprint supplement (doi:10.21203/rs.3.rs-9250179/v1)
Supplement: Supplementary file 1 [file 493e5d078320094b2ed82517.docx]

### **Table 2: Characteristics of WPV exposure among medical students (N=581)**

|  | **N (%)** |
| --- | --- |
| **Personal witnessing of WPV incidents perpetrated by patients or their relatives against physicians**** |  |
| Yes | 393 (67.6%) |
| Verbal: Shouting, threatening, or insulting | 367 (63.2%) |
| Physical: Punching, kicking, fights, or attacks | 160 (27.5%) |
| Equipment or tool damage | 68 (11.7%) |
| ِAttack with a weapon or an object | 62 (10.7%) |
| Sexual: harassment, assault | 32 (5.5%) |
| No | 188 (32.4%) |
| **Personal witnessing of WPV incidents perpetrated by senior physicians towards junior physicians**** |  |
| Yes | 351 (60.4%) |
| Verbal abuse: Shouting, threatening, or insulting | 246 (42.6%) |
| Bullying | 129 (22.3%) |
| Emotional Manipulation | 117 (20.2%) |
| Discrimination and undermining | 111 (19.2%) |
| Retaliation: spreading rumors, sabotaging work, or reporting false complaints, as a form of revenge | 57 (9.9%) |
| Physical violence: Punching, kicking, fights, or attacks | 28 (4.8%) |
| Sexual harassment | 18 (3.1%) |
| No | 230 (39.6%) |
| **Personal experience of any sort of WPV perpetrated by patients, their relatives, or other HCWs**** |  |
| Yes | 207 (35.6%) |
| Verbal: Shouting, threatening, or insulting | 150 (25.8%) |
| Discrimination and undermining | 59 (10.2%) |
| Physical: Punching, kicking, fights, or attacks | 52 (9.0%) |
| ِAttack with a weapon or an object | 25 (4.3%) |
| Sexual: harassment, assault | 17 (2.9%) |
| No | 374 (64.4%) |
| **Frequency of personal exposure to any sort of WPV perpetrated by patients or their relatives** |  |
| Daily | 28 (4.8%) |
| Weekly | 27 (4.6%) |
| Less than monthly (every 2-3 weeks) | 32 (5.5%) |
| Monthly | 32 (5.5%) |
| More than monthly (every 2 months, every 3 months) | 50 (8.6%) |
| I’m rarely exposed to violence | 412 (70.9%) |
| **Multiple response analysis |  |

###

### **Table 3: Characteristics of WPV exposure among early-career physicians (N=553)**

|  | **N (%)** |
| --- | --- |
| **Perception of safety in your current healthcare setting** |  |
| Very unsafe | 87 (15.7%) |
| Unsafe | 125 (22.6%) |
| Neutral | 211 (38.2%) |
| Safe | 94 (17.0%) |
| Very safe | 36 (6.5%) |
| **Feelings of intimidation or threats in your workplace without direct physical or verbal violence** |  |
| Yes | 150 (27.1%) |
| No | 198 (35.8%) |
| Uncertain | 205 (37.1%) |
| **Personal exposure to any sort of WPV perpetrated by patients or their relatives**** |  |
| Yes | 400 (72.3%) |
| Verbal: Shouting, threatening, or insulting | 355 (64.2%) |
| Physical: Punching, kicking, fights, or attacks | 79 (14.3%) |
| Equipment or tool damage | 54 (9.8%) |
| Sexual: harassment, assault | 31 (5.6%) |
| ِAttack with a weapon or an object | 20 (3.6%) |
| No | 153 (27.7%) |
| **Frequency of personal exposure to any sort of WPV perpetrated by patients or their relatives** |  |
| Daily | 39 (7.1%) |
| Weekly | 87 (15.7%) |
| Less than monthly (every 2-3 weeks) | 71 (12.8%) |
| Monthly | 59 (10.7%) |
| More than monthly (every 2 months, every 3 months) | 55 (9.9%) |
| Rarely (few times per year) | 89 (16.1%) |
| Did not experience violence from patients or relatives | 153 (27.7%) |
| **Consequences of exposure to patient-perpetrated WPV**** |  |
| Decreased work performance | 192 (34.7%) |
| Nothing | 123 (22.2%) |
| Felt ashamed or guilty | 120 (21.7%) |
| Absenteeism (habitual non-presence at your job) | 62 (11.2%) |
| Injury (did not need medical care) | 25 (4.5%) |
| I was punished | 17 (3.1%) |
| Psychological effects | 11 (2.0%) |
| Injury (needed medical care) | 3 (0.5%) |
| Did not experience violence from patients or relatives | 153 (27.7%) |
| **Experience of working overtime against your will** |  |
| Yes | 320 (57.9%) |
| No | 233 (42.1%) |
| **Personal exposure to any sort of WPV perpetrated by colleagues, seniors, or other HCWs**** |  |
| Yes | 383 (69.3%) |
| Verbal abuse: Shouting, threatening, or insulting | 232 (42.0%) |
| Dealing with negative attitudes from colleagues | 211 (38.2%) |
| Emotional Manipulation | 144 (26.0%) |
| Discrimination and undermining | 120 (21.7%) |
| Bullying | 91 (16.5%) |
| Retaliation: spreading rumors, sabotaging work, or reporting false complaints as a form of revenge | 61 (11.0%) |
| Physical violence: Punching, kicking, fights, or attacks | 16 (2.9%) |
| Sexual harassment | 15 (2.7%) |
| No | 170 (30.7%) |
| **Multiple response analysis |  |

### **Table 4: Emigration intentions, experiences, and attitudes among students and early-career physicians (N=1134)**

|  | **Students (n=581)*** | **Early-career Physicians (n=553)*** | **Total (N=1134)*** |
| --- | --- | --- | --- |
| **Emigration intentions** | | | |
| **Presence of intention to work abroad (emigration intention)** | | | |
| Yes | 404 (69.5%) | 375 (67.8%) | 779 (68.7%) |
| No | 46 (7.9%) | 37 (6.7%) | 83 (7.3%) |
| I have not decided yet | 131 (22.5%) | 141 (25.5%) | 272 (24.0%) |
| Intended length of staying abroad (N=779) | | | |
| Less than a year | 5 (1.2%) | 7 (1.9%) | 12 (1.5%) |
| 1-2 years | 16 (4.0%) | 9 (2.4%) | 25 (3.2%) |
| 3-5 years | 31 (7.7%) | 30 (8.0%) | 61 (7.8%) |
| >5 years | 33 (8.2%) | 37 (9.9%) | 70 (9.0%) |
| >10 years | 69 (17.1%) | 66 (17.6%) | 135 (17.3%) |
| I have not decided yet | 170 (42.1%) | 133 (35.5%) | 303 (38.9%) |
| Do not intend to return | 80 (19.8%) | 93 (24%.8) | 173 (22.2%) |
| **Presence of serious steps towards emigration (N=779)** | | | |
| Yes | 72 (17.8%) | 142 (37.9%) | 214 (27.5%) |
| No | 332 (82.2%) | 233 (62.1%) | 565 (72.5%) |
| **WPV exposure influenced decision to emigrate (N=779)** | | | |
| Yes | 83 (20.5%) | 113 (30.1%) | 196 (25.2%) |
| No | 171 (42.3%) | 108 (28.8%) | 279 (35.8%) |
| To some extent | 150 (37.1%) | 154 (41.1%) | 304 (39.0%) |
| **Motivations to emigrate (N=779)**** | | | |
| Improve future career | 354 (87.6%) | 311 (82.9%) | 665 (85.4%) |
| Financial conditions | 347 (85.9%) | 317 (84.5%) | 664 (85.2%) |
| Better working conditions | 344 (85.1%) | 299 (79.7%) | 643 (82.5%) |
| More training & development opportunities | 261 (64.6%) | 241 (64.3%) | 502 (64.4%) |
| Better clinical training | 243 (60.1%) | 225 (60.0%) | 468 (60.1%) |
| Lifestyle | 222 (55.0%) | 218 (58.1%) | 440 (56.5%) |
| Social conditions | 158 (39.1%) | 160 (42.7%) | 318 (40.8%) |
| Personal reasons | 132 (32.7%) | 80 (21.3%) | 212 (27.2%) |
| Independence | 124 (30.7%) | 84 (22.4%) | 208 (26.7%) |
| Political conditions | 113 (28.0%) | 74 (19.7%) | 187 (24.0%) |
| Family & Friends | 62 (15.3%) | 45 (12.0%) | 107 (13.7%) |
| **Emigration experiences and attitudes** | | | |
| **Previous traveling experience for academic or career related purposes** | | | |
| Yes | 151 (26.0%) | 105 (19.0%) | 256 (22.6%) |
| No | 430 (74.0%) | 448 (81.0%) | 878 (77.4%) |
| **If present, reasons for traveling (N=256)**** |  |  |  |
| Attend a conference or a seminar | 33 (21.9%) | 38 (36.2%) | 71 (27.7%) |
| Participating in an exchange program | 33 (21.9%) | 36 (34.3%) | 69 (27.0%) |
| Participate in medical training | 40 (26.5%) | 28 (26.7%) | 68 (26.6%) |
| Taking an elective | 28 (18.5%) | 12 (11.4%) | 40 (15.6%) |
| For internship | 17 (11.3%) | 15 (14.3%) | 32 (12.5%) |
| Taking an exam | 0 (0%) | 2 (1.9%) | 2 (0.8%) |
| **Intention to receive medical training or internship abroad** | | | |
| Yes | 368 (63.3%) | 284 (51.4%) | 652 (57.5%) |
| No | 64 (11.0%) | 96 (17.4%) | 160 (14.1%) |
| I have already done that | 16 (2.8%) | 15 (2.7%) | 31 (2.7%) |
| I have not decided yet | 133 (22.9%) | 158 (28.6%) | 291 (25.7%) |
| **Do you agree that violence against HCWs in Egypt has contributed to their emigration?** | | | |
| Strongly disagree | 33 (5.7%) | 33 (6.0%) | 66 (5.8%) |
| Disagree | 33 (5.7%) | 16 (2.9%) | 49 (4.3%) |
| Neutral | 110 (18.9%) | 75 (13.6%) | 185 (16.3%) |
| Agree | 209 (36.0%) | 177 (32.0%) | 386 (34.0%) |
| Strongly agree | 196 (33.7%) | 252 (45.6%) | 448 (39.5%) |
| **Perception of possible measures to decrease HCWs emigration**** | | | |
| Improve working conditions and raise salaries | 473 (81.4%) | 465 (84.1%) | 938 (82.7%) |
| Enhance training, education, and research opportunities for domestic healthcare professionals | 378 (65.1%) | 386 (69.8%) | 764 (67.4%) |
| Implement policies to prevent workplace violence | 372 (64.0%) | 368 (66.5%) | 740 (65.3%) |
| Invest in healthcare infrastructure and resources | 326 (56.1%) | 352 (63.7%) | 678 (59.8%) |
| Enhance collaboration and partnerships between countries to share expertise | 280 (48.2%) | 283 (51.2%) | 563 (49.6%) |
| *Percents are column-wise **Multiple response analysis | | | |
