# Supplementary material
Source: Research Square preprint supplement (doi:10.21203/rs.3.rs-9250179/v1)
Supplement: Supplementary file 2 [file f209c9079a42cdc7b9e1e5d0.docx]

Emigration intention of medical students and early-career physicians and its association with workplace violence: A national cross-sectional study in Egypt.

This study aims to investigate the prevalence of the intention to emigrate (brain drain) and its relation to different types of workplace violence (WPV) amongst medical students, interns, and residents in Egypt.

* Indicates required question

1. **Informed Consent:** *
   1. Your responses are highly conﬁdential and will be used for research purposes only.
   2. Your identity and personal information will remain anonymous.
   3. You are completely free to refuse to participate or proceed to submission.

# Do you understand and agree to fill out in this form?


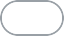
 Yes
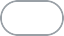
 No

# Gender


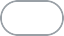
 Male
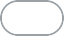
 Female

# Age (in years) *

1. **Marital status** *


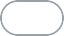
 Single
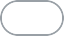
 Engaged
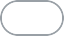
 Married
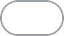
 Divorced
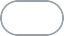
 Widowed

#
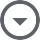
University *


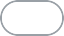
 AAST


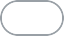
 Ain Shams
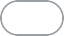
 Alexandria


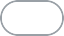
 Armed Forces Medical College
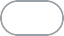
 Assuit


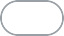
 Aswan


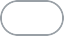
 Azhar-Assuit
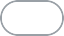
 Azhar-Cairo
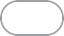
 Benha


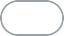
 Beni Sweif


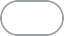
 Beni Sweif National University
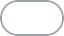
 Damietta


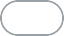
 Delta
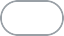
 Fayoum
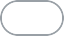
 Galala
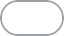
 Helwan
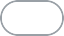
 Horus


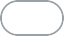
 Kafr El-Sheikh
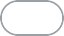
 Kasr Al-Ainy
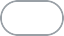
 Kena


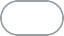
 King Salman International University
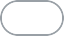
 Mansoura


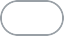
 Mansoura National University
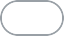
 Menouﬁa


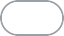
 Minya


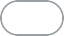
 Minya National University
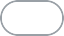
 MTI


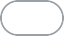
 MUST


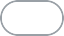
 New Giza


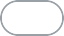
 New Mansoura

Dropdown

Nahda

6 October Port Said Suez

Suez Canal Sohag Tanta

# Current employment status *

Medical Student (Not yet practicing) (Clinical years) Medical Intern

Resident (University Hospital)

Other:

# Academic year *

Please don't select intern unless you've already started your rotations as an intern


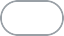
 Not a student (Resident)


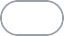
 Intern

# Current income (per month) from the government: *


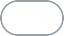
 Less than 2000 EGP
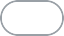
 2000-5000 EGP


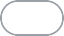
 5000-10.000 EGP


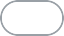
 More than 10.000 EGP

# Do you have any other sources of income?


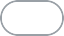
 Yes
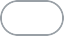
 No

**Exposure to violence (for interns and residents)**

This section aims to explore the exposure of violence in varied settings including: physical, verbal and/or sexual violence - Including those from patients, their relatives, colleagues, seniors, or other healthcare workers

**Doctor-patient relationship**

1. **On a scale from 1-5, to what extent do you feel safe in your current** *

**healthcare setting?**

1 2 3 4 5


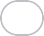

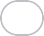

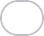

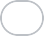

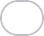


Very Safe

Very Unsafe

# Have you ever been intimidated or felt threatened in your *

**workplace without direct physical or verbal violence?**


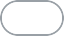
 Yes
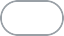
 No

Uncertain


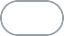


# Have you personally experienced any sort of violence or *

**aggression from patients or their relatives in your workplace?**

If yes, select all that apply. If no answer applies to you, please choose "did not experience violence".

*Check all that apply.*


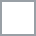
 Physical: Punching, kicking, ﬁghts, or attacks
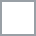
 Verbal: Shouting, threatening, or insulting
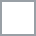
 Sexual: harassment, assault


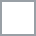
 Attack with a weapon or an object
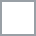
 Equipment or tool damage


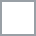
 Did not experience violence

Other:

# How often have you faced violent assaults from patients and *

**relatives?**

If you chose "did not experience violence" in the above question, please choose it again in the following two questions.


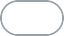
 Did not experience violence
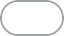
 Daily


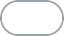
 Weekly


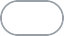
 Less than monthly (every 2-3 weeks)
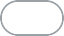
 Monthly


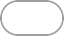
 More than monthly (every 2 months, every 3 months)
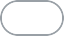
 Rarely (few times per year)

# What was the consequence of the violent attack? (Select all that *

**apply)**

*Check all that apply.*


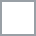
 Decreased work performance
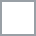
 I was punished


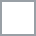
 Felt ashamed or guilty


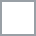
 Absenteeism (habitual non-presence at your job)
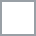
 Injury (did not need medical care)


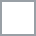
 Injury (needed medical care)
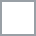
 Nothing


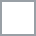
 Did not experience violence

Other:

**Doctor-Doctor relationship**

1. **Have you ever been working for a longer time against your will in** *

**your workplace?**


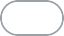
 Yes
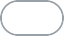
 No

# Have you ever been exposed to violence from your work *

**colleagues, seniors, or other healthcare workers (Eg: Nurses)?**

If yes, select all that apply. If no answer applies to you, please choose "did not experience violence".

*Check all that apply.*


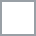
 Verbal abuse: Shouting, threatening, or insulting


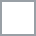
 Physical violence: Punching, kicking, ﬁghts, or attacks
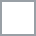
 Bullying


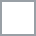
 Sexual harassment


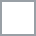
 Discrimination and undermining


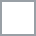
 Retaliation: spreading rumors, sabotaging work, or reporting false complaints as a form of revenge


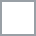
 Emotional Manipulation


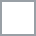
 Dealing with negative attitudes from colleagues
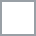
 Did not experience violence

Other:

# Witnessing workplace violence (for medical students)

# This section aims to assess exposure of medical students in clinical years to types of violence from: patients, their relatives, or healthcare personnel, which were faced or observed at hospitals and/or during clinical rounds.

# Have you ever seen any sort of violence from patients or their * relatives toward doctors during your presence at the hospital (in clinical rounds, for example)?

If yes, select all that apply. If no answer applies to you, please choose "did not witness any violence".

*Check all that apply.*


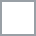
 Physical: Punching, kicking, ﬁghts, or attacks
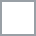
 Verbal: Shouting, threatening, or insulting
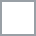
 Sexual: harassment, assault


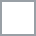
 Attack with a weapon or an object
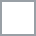
 Equipment or tool damage


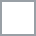
 Did not witness any violence

Other:

# Have you ever seen any type of violence from senior doctors towards junior doctors in your clinical rounds?

If yes, select all that apply. If no answer applies to you, please choose "did not witness any violence between doctors".

*Check all that apply.*


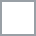
 Verbal abuse: Shouting, threatening, or insulting


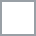
 Physical violence: Punching, kicking, ﬁghts, or attacks
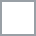
 Bullying


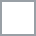
 Sexual harassment


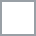
 Discrimination and undermining


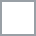
 Retaliation: spreading rumors, sabotaging work, or reporting false complaints, as a form of revenge

Emotional Manipulation

Did not witness any violence between doctors

Other:

# Have you personally experienced any sort of violence or * aggression from patients, their relatives, or other healthcare workers in healthcare facilities?

If yes, select all that apply. If no answer applies to you, please choose "I didn't experience any type of violence".

*Check all that apply.*

Physical: Punching, kicking, ﬁghts, or attacks Verbal: Shouting, threatening, or insulting Sexual: harassment, assault

Attack with a weapon or an object Discrimination and undermining

I didn’t experience any type of violence

# How often do you face violent assaults from patients and *

**relatives?**

Daily Weekly

Less than monthly (every 2-3 weeks) Monthly

More than monthly (every 2 months, every 3 months) I’m rarely exposed to violence (almost never exposed)

# Intention to emigrate

# This section aims to evaluate intentions for emigration for students, interns, and residents, followed by possible reasons for the choice. Moreover, opinions and views regarding minimizing emigration of healthcare personnel

# Did you consider leaving Egypt to pursue a healthcare career *

**abroad?**

Yes

No

I have not decided yet

# How long do you intend to stay abroad? *

Less than a year 1-2 years

3-5 years

+5 years

+10 years

I have not decided yet Do not intend to return

# Have you taken any serious steps towards immigration? *

Yes No

# If yes, please specify what they are and when

(ex: preparing for or already taken licensing examination like USMLE)

# Was your decision to emigrate inﬂuenced by exposure to *

**workplace violence in any way?**

Yes No

To some extent

# What are all possible reasons for your desire to emigrate? *

(choose all that apply)

*Check all that apply.*

Improve future career Financial conditions

Better working conditions

More training & development opportunities Better clinical training

Social conditions Family & Friends Lifestyle

Personal reasons Independence

Political conditions

Other:

# Have you traveled abroad for academic-related or career-related *

**purposes?**

Yes No

# If yes, why did you travel?

(select all that applies)

*Check all that apply.*

Attend a conference or a seminar Participate in a medical training Taking an elective

Participating in an exchange program For internship

Other:

# Do you plan on receiving any medical training or internship *

**abroad?**

Yes No

I have already done that I have not decided yet

# Do you believe that violence against healthcare workers in Egypt * has contributed to the healthcare worker emigration phenomenon?

Strongly disagree Disagree

Neutral Agree

Strongly Agree

# In your opinion, how can the emigration of healthcare workers *

**be minimized?**

Select all that apply

*Check all that apply.*

Enhance training, education, and research opportunities for domestic healthcare professionals

Invest in healthcare infrastructure and resources Improve working conditions and raise salaries

Implement policies to prevent workplace violence

Enhance collaboration and partnerships between countries to share expertise

Other:

**End of Survey**

Thank you for completing this survey; we appreciate your effort and time. Your answers are completely anonymous as you signed at the beginning of this form. If you have any questions, don't hesitate to contact the study representative at your university.

This content is neither created nor endorsed by Google.

[Forms](https://www.google.com/forms/about/?utm_source=product&utm_medium=forms_logo&utm_campaign=forms)
